# Supplementary material for: Towards cost-competitive middle distillate fuels from ethanol within a market-flexible biorefinery concept
Source: Royal Society of Chemistry journal article supplement (doi:10.1039/d1gc02854e), 2021-01-01
Supplement: d1gc02854e1.pdf [file d1gc02854e1.pdf]

Electronic Supplementary Information (ESI)

# Towards cost-competitive middle distillate fuels from ethanol within a market-flexible biorefinery concept

Junyan Zhang<sup>a,b</sup>, Eunji Yoo<sup>c</sup>, Brian H. Davison<sup>d</sup>, Dongxia Liu<sup>b</sup>, Joshua A. Schaidle<sup>e</sup>, Ling Tao<sup>e\*</sup>, Zhenglong Li<sup>a\*</sup>

<sup>a</sup> Manufacturing Science Division, Oak Ridge National Laboratory, Oak Ridge, TN 37830, USA.

<sup>b</sup> Department of Chemical and Biomolecular Engineering, University of Maryland, College Park, MD 20742, USA.

<sup>c</sup> Energy Systems division, Argonne National Laboratory, Chicago, Lemont, IL 60439, USA.

<sup>d</sup> Bioscience Division, Oak Ridge National Laboratory, Oak Ridge, TN 37830, USA.

<sup>e</sup> Catalytic Carbon Transformation & Scale-up Center, National Renewable Energy Laboratory, Golden, CO 80401, USA.

\*Corresponding authors, E-mail: liz3@ornl.gov; Ling.Tao@nrel.gov

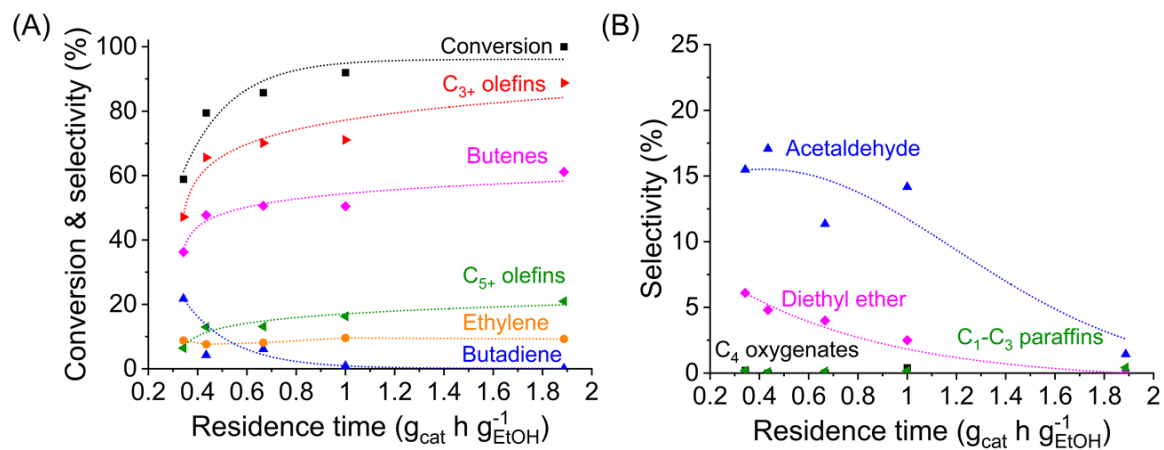

**Figure S1.** (A) Ethanol conversion and olefin selectivities; and (B) oxygenate selectivities over Cu-Zn-Y/Beta at different residence time. Reaction conditions: 0.054-0.19 g Cu-Zn-Y/Beta catalyst diluted in 0.8 g SiC, 623 K, 7.4-8.4 kPa ethanol, 99.4-113.5 kPa  $\text{H}_2$  (variation caused by pressure drop through the catalyst bed at different flow rates). Data is collected at TOS 1.1 h.  $\text{C}_4$  oxygenates include 1-butanol, crotyl alcohol, butyraldehyde, and 2-butanone, etc.

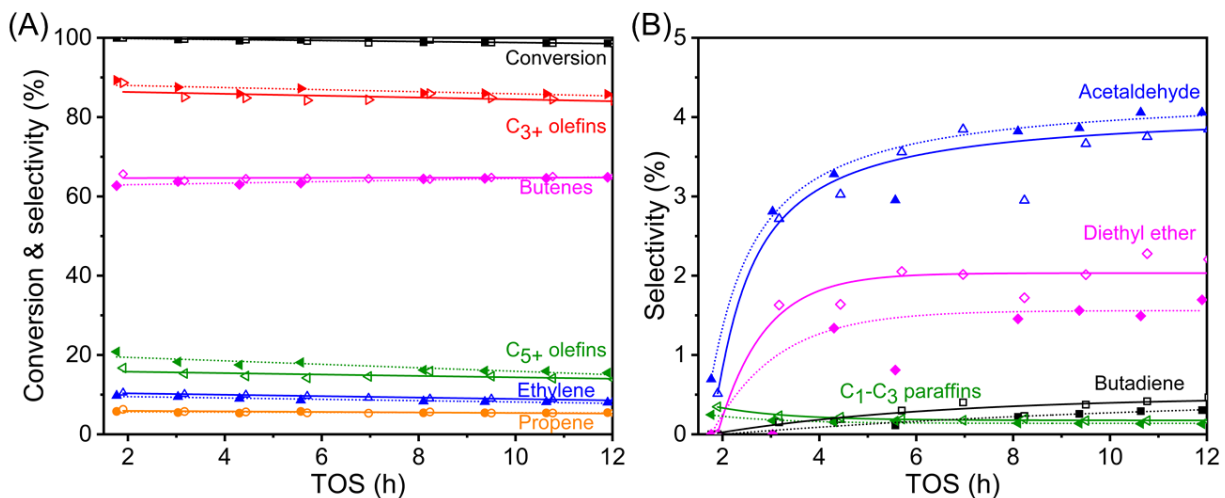

**Figure S2.** Water impact on ethanol conversion and product selectivity (Reaction conditions:  $\sim 0.3$  g Cu-Zn-Y/Beta catalyst,  $0.52 \text{ h}^{-1}$  WHSV, total pressure 109.6 kPa, 6.0 kPa ethanol, 80.6 kPa hydrogen balanced with Ar). Solid and open symbols represent with (2.3 kPa water) or without water cofeeding, respectively. The lines are used to guide the eye.

**Table S1.** Ethanol conversion and product selectivities for literature reported ethanol to olefin conversion catalysts.

| Type of pathway                                                  | Catalyst                                                                             | T (K) | Pressure (MPa) | Ethanol Partial Pressure (kPa) | Conversion | Selectivity             |          |                 |         |                                |                 | Reference |
|------------------------------------------------------------------|--------------------------------------------------------------------------------------|-------|----------------|--------------------------------|------------|-------------------------|----------|-----------------|---------|--------------------------------|-----------------|-----------|
|                                                                  |                                                                                      |       |                |                                |            | C <sub>3+</sub> olefins | Ethylene | CO <sub>2</sub> | Butenes | Butene/C <sub>3+</sub> olefins | Light paraffins |           |
| Lewis acid zeolites catalyzed with butyraldehyde as intermediate | Cu-Zn-Y/Beta                                                                         | 623   | 0.1            | 7.3                            | 100        | 88                      | 9.1      | <0.1            | 66      | 75                             | 0.5             | This work |
| Brønsted acid zeolites catalyzed with ethylene as intermediate   | 5.0 Ce-nano-H-ZSM-5                                                                  | 673   | 0.1            | 6.2                            | 99         | 39                      | 41       | N/A*            | 21      | 54                             | N/A             | 1         |
|                                                                  | MFI-40 (Si/Al = 80)                                                                  | 683   | 0.1            | 19                             | 100        | 51                      | 26       | N/A             | 17      | 33                             | 7.8             | 2         |
|                                                                  | In <sub>2</sub> O <sub>3</sub> -Beta                                                 | 733   | 0.1            | 10                             | 100        | 56                      | N/A      | N/A             | 6.0     | 11                             | 5.0             | 3         |
|                                                                  | P modified H-ZSM-5                                                                   | 773   | 0.1            | 91                             | 100        | 38                      | 15       | N/A             | 12      | 32                             | N/A             | 4         |
|                                                                  | H-ZSM-5/SAPO-34 composite                                                            | 773   | 0.1            | 20                             | 100        | 46                      | 22       | N/A             | 21      | 46                             | N/A             | 5         |
|                                                                  | H-ZSM-5 (SAR 50)                                                                     | 773   | 0.1            | 51                             | 100        | 41                      | 33       | N/A             | 16      | 39                             | 12              | 6         |
| Oxides catalyzed with acetone as intermediate                    | Zn <sub>1</sub> Zr <sub>10</sub> O <sub>x</sub> (Zn(NO <sub>3</sub> ) <sub>2</sub> ) | 723   | 0.1            | 0.6                            | 100        | 58                      | 3.9      | 16              | 55      | 95                             | 5.4             | 7         |
|                                                                  | Zn <sub>1</sub> Zr <sub>10</sub> O <sub>x</sub> (Zn(NO <sub>3</sub> ) <sub>2</sub> ) | 723   | 0.1            | 1.8                            | 100        | 37                      | 2.7      | 23              | 52      | 94                             | N/A             | 7         |
|                                                                  | Zn <sub>1</sub> Zr <sub>10</sub> O <sub>x</sub> (Zn(Ac) <sub>2</sub> )               | 723   | 0.1            | 1.5                            | 100        | 53                      | 2.5      | 23              | 49      | 92                             | N/A             | 8         |
|                                                                  | Zn <sub>1</sub> Zr <sub>10</sub> O <sub>x</sub> (ZnCl <sub>2</sub> )                 | 723   | 0.1            | 1.5                            | 100        | 29                      | 2.2      | 26              | 26      | 90                             | N/A             | 8         |
|                                                                  | Nb <sub>10</sub> /CeO <sub>2</sub>                                                   | 673   | 0.1            | 30                             | 100        | 42                      | 17       | N/A             | 10      | 24                             | N/A             | 9         |
|                                                                  | Ti <sub>10</sub> /CeO <sub>2</sub>                                                   | 673   | 0.1            | 30                             | 100        | 39                      | 15       | N/A             | 12      | 31                             | N/A             | 9         |
|                                                                  | CeO <sub>2</sub>                                                                     | 693   | 0.1            | 30                             | 100        | 15                      | 31       | N/A             | 2.3     | 15                             | N/A             | 9         |
|                                                                  | Y <sub>20</sub> /CeO <sub>2</sub>                                                    | 703   | 0.1            | 30                             | 100        | 31                      | 37       | N/A             | 0.2     | 0.6                            | N/A             | 9         |
|                                                                  | ZrO <sub>2</sub>                                                                     | 723   | 1.1            | 34                             | 89         | 46                      | 5.6      | N/A             | 0.6     | 1.3                            | N/A             | 10        |
|                                                                  | Mg <sub>1</sub> /ZrO <sub>2</sub>                                                    | 723   | 1.1            | 34                             | 93         | 39                      | 47       | 10              | 0.8     | 2.1                            | N/A             | 10        |
|                                                                  | Ca <sub>5</sub> /ZrO <sub>2</sub>                                                    | 723   | 1.1            | 34                             | 86         | 39                      | 44       | 8.8             | 0.8     | 2.1                            | N/A             | 10        |
|                                                                  | Sr <sub>3</sub> /ZrO <sub>2</sub>                                                    | 723   | 1.1            | 34                             | 99         | 39                      | 43       | 9.9             | 0.4     | 1.0                            | N/A             | 10        |
|                                                                  | Ba <sub>5</sub> /ZrO <sub>2</sub>                                                    | 723   | 1.1            | 34                             | 91         | 39                      | 46       | 11              | 0.8     | 2.1                            | N/A             | 10        |
|                                                                  | In <sub>2</sub> O <sub>3</sub>                                                       | 723   | 0.1            | 30                             | 100        | 39                      | N/A      | N/A             | 16.1    | 41                             | N/A             | 11        |
|                                                                  | Sc <sub>3</sub> /In <sub>2</sub> O <sub>3</sub>                                      | 823   | 0.1            | 30                             | 100        | 51                      | N/A      | N/A             | 9.8     | 19                             | N/A             | 11        |
| Ag-ZrO <sub>2</sub> /SiO <sub>2</sub>                            | 598                                                                                  | 0.7   | 77             | 93.9                           | 60.7       | 25.7                    | <0.3     | 57.7            | 95      | 6.5                            | 12              |           |

Transition  
metal  
promoted  
Lewis acid  
oxide  
catalyzed  
with  
butadiene as  
intermediate

Ag-ZrO<sub>2</sub>/SiO<sub>2</sub>

673

0.7

77

99

69

19

N/A

63

91

N/A

12

---

\*N/A: not available in the reported work.

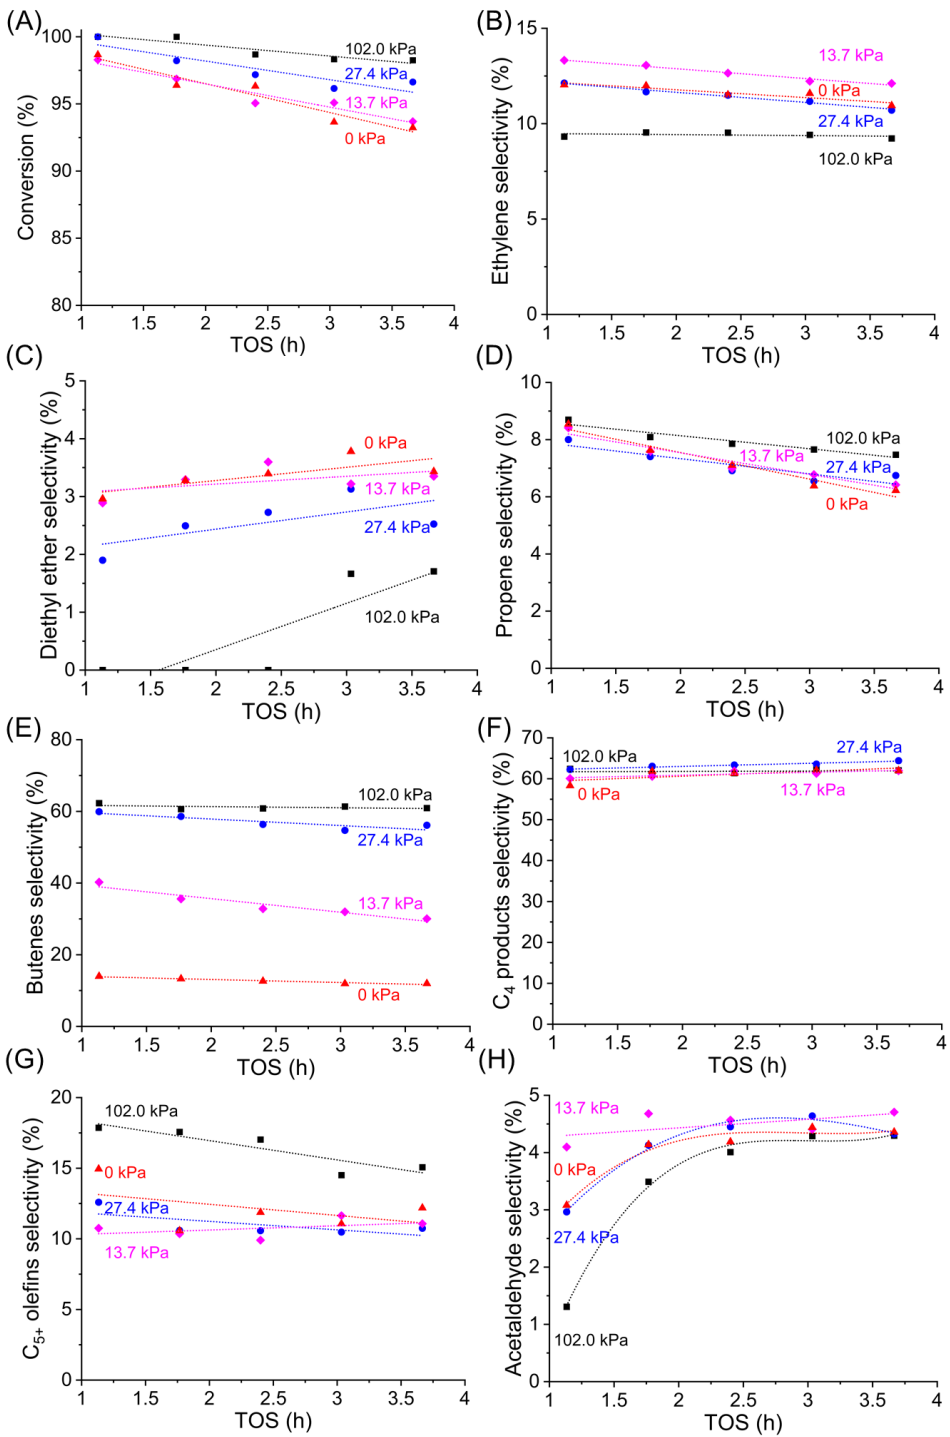

**Figure S3.** Hydrogen partial pressure impact on ethanol conversion and product distributions. C<sub>4</sub> products include butenes and butadiene.

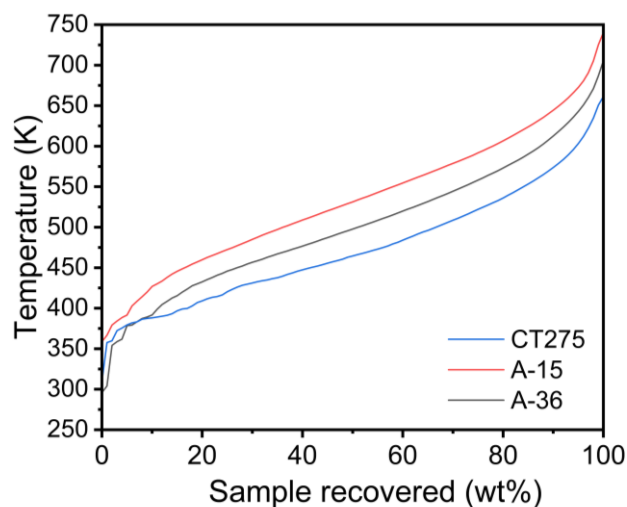

**Figure S4.** Simulated distillation of the liquid hydrocarbons obtained from oligomerization of  $C_{3+}$  olefins over Amberlyst-36 (A-36), Amberlyst-15 (A-15) and CT275. Olefin conversions: for A-36, 100% propene conversion, 99% butenes conversion, 93% 2-pentene conversion and 96% 2-hexene conversion; for A-15, 100% conversion of propene, butenes and 2-hexene, and 96% 2-pentene conversion; for CT275, 100% propene conversion, 95% butenes conversion, 90% 2-pentene conversion and 77% 2-hexene conversion. Mass balance of the reaction is 95-101%.

**Table S2.** Carbon conversion efficiency for ethanol to liquid hydrocarbons

| <b>Step</b>                          | <b>Carbon Efficiency<br/>(mol C in product/mol C<br/>in feed)</b> |
|--------------------------------------|-------------------------------------------------------------------|
| Ethanol to C <sub>3+</sub> olefins   | 0.89                                                              |
| Oligomerization to C <sub>5+</sub>   | 0.94                                                              |
| Oligomerization to middle distillate | 0.84                                                              |
| Hydrotreating                        | 0.99*                                                             |
| Overall (to liquid hydrocarbons)     | 0.85                                                              |
| Overall (to middle distillate)       | 0.74                                                              |

\* Estimated based on the NREL 2018 Biochemical Design Case report<sup>13</sup>.



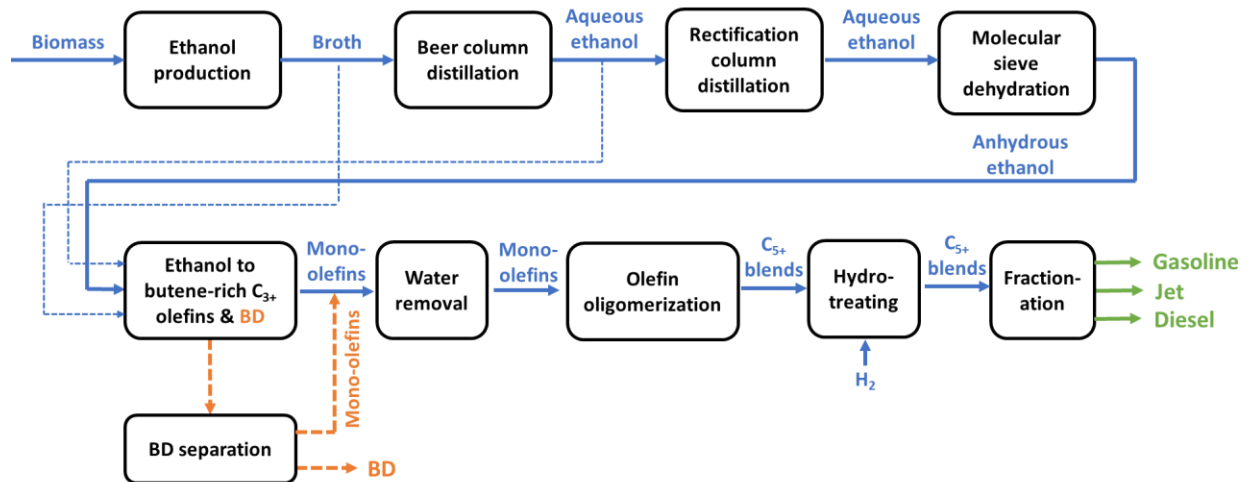

**Scheme S1.** Process scheme of biomass conversion to hydrocarbon fuels and butadiene. The orange dashed arrows indicate the ethanol-to-middle-distillate-and-butadiene operation mode. Ethanol production includes feedstock handling, pretreatment, saccharification (or enzymatic hydrolysis) and fermentation.

**Table S3.** Process parameters for the base case and sensitivity analysis

| Process Parameters                                    | Base Values | Parameter Changes | % Change in Parameter |
|-------------------------------------------------------|-------------|-------------------|-----------------------|
| Inlet ethanol concentration (wt.%)                    | 100%        | 13-100%           | -87                   |
| Oligomerization catalyst WHSV ( $\text{h}^{-1}$ )     | 1           | 0.25–5            | -75 and +400          |
| Liquid hydrocarbon yield (GGE/gallon EtOH)            | 0.58        | 0.43              | -26                   |
| Ethanol upgrading catalyst WHSV ( $\text{h}^{-1}$ )   | 1           | 0.25-3            | -75 and +200          |
| Oligomerization catalyst replacement (year)           | 1           | 0.5-2             | -50 and +100          |
| Oligomerization catalyst cost (\$/kg)                 | 154         | 77-231            | -50 and +50           |
| Ethanol upgrading catalyst replacement (year)         | 1           | 0.5-2             | -50 and +100          |
| Ethanol upgrading catalyst cost (\$/kg)               | 60          | 30-90             | -50 and +50           |
| Upgrading reaction temperature ( $^{\circ}\text{C}$ ) | 350         | 250-450           | -29 and +29           |

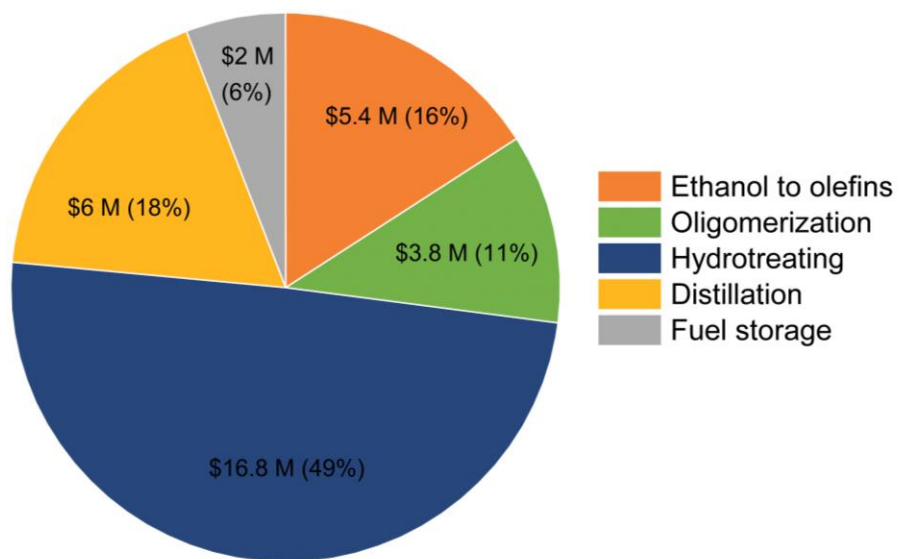

**Figure S5.** Total installed equipment cost for ethanol upgrading, separation and fuel storage (unit: million USD)

**Table S4.** MFSP based on ethanol feed with different ethanol concentrations

|               | Ethanol Prices<br>(\$/gal) | Ethanol Prices<br>(\$/GGE) | Upgrading Costs<br>(\$/GGE) | MFSP<br>(\$/GGE) |
|---------------|----------------------------|----------------------------|-----------------------------|------------------|
| 100% Ethanol* | \$1.79                     | \$2.72                     | \$0.60                      | \$3.68           |
| 50% Ethanol   | \$1.70                     | \$2.58                     | \$0.64                      | \$3.57           |
| 13% Ethanol   | \$1.59                     | \$2.42                     | \$0.87                      | \$3.61           |

\*Corn ethanol price of \$1.79 is used for the 100% ethanol case. We assume similar liquid hydrocarbon yield from different ethanol feeds.

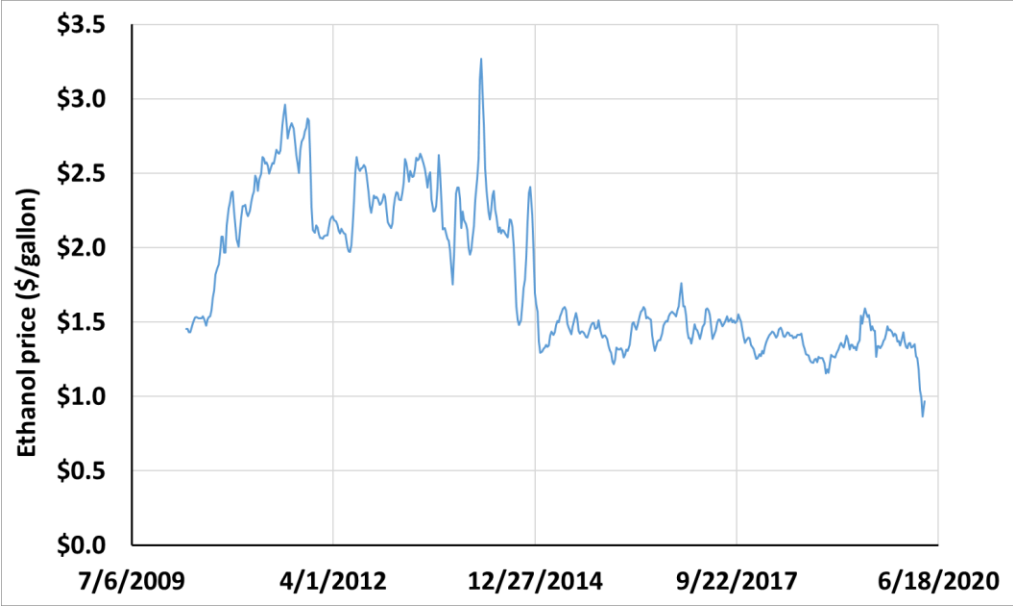

Figure S6. Historical ethanol selling price in 2010-2020.

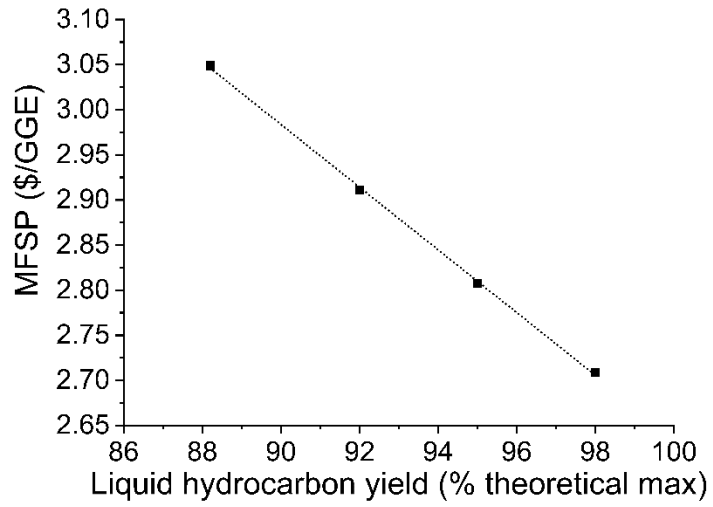

**Figure S7.** MFSP vs liquid hydrocarbon yield with corn stover as feedstock. Projected corn stover ethanol price (\$1.42/gal) is used here.

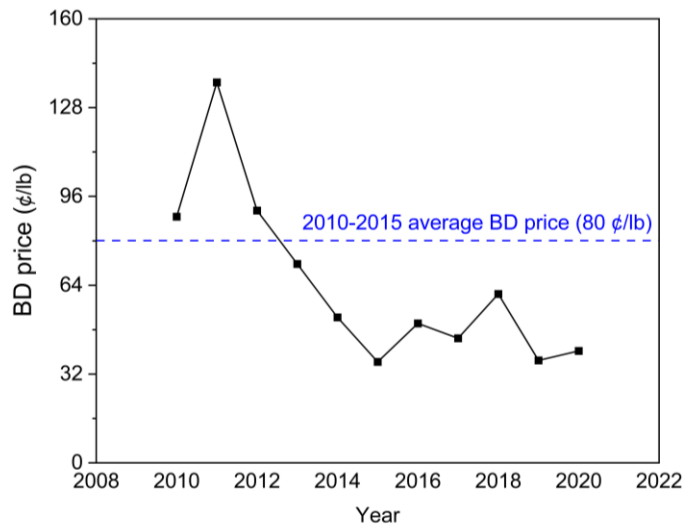

**Figure S8.** Butadiene historical price in 2010-2020.

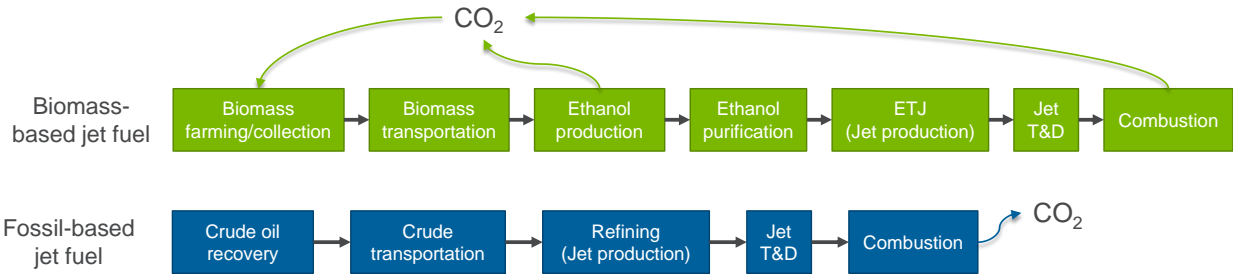

**Figure S9.** Well-to-wake pathways of biomass-based and fossil-based jet fuel (ETJ: ethanol to jet, T&D: transportation and distribution, NG: natural gas, FT: Fischer Tropsch)



**Table S5.** Major parameters and key assumptions of the life cycle analysis of ethanol supply chain

|                                                                  | Corn starch                         |                                    |                               | Corn stover              | Miscanthus            |
|------------------------------------------------------------------|-------------------------------------|------------------------------------|-------------------------------|--------------------------|-----------------------|
|                                                                  | Dry milling w/o corn oil extraction | Dry milling w/ corn oil extraction | Wet milling                   |                          |                       |
| Ethanol yield                                                    | 2.93 (gal per bushel of corn)       | 2.95 (gal per bushel of corn)      | 2.74 (gal per bushel of corn) | 93.7 (gal per dry MT)    | 93.7 (gal per dry MT) |
| Share of Corn Ethanol Plant Types (corn starch)                  | 18.2%                               | 72.9%                              | 8.9%                          |                          |                       |
| Co-product *                                                     | DDGS, soybean mill, urea            |                                    |                               | Co-generated electricity |                       |
| Land-use change ** (grams CO <sub>2</sub> per gal ethanol)       | 594                                 |                                    |                               | -50                      | -1,607                |
| <b>Energy inputs for ethanol production *** (MJ/gal ethanol)</b> |                                     |                                    |                               |                          |                       |
| Natural gas                                                      | 9.1                                 | 8.7                                | 21.8                          |                          |                       |
| Coal                                                             | 2.1                                 | 2.0                                | 13.8                          |                          |                       |
| Electricity                                                      | 2.7                                 | 2.6                                |                               |                          |                       |
| Diesel                                                           |                                     |                                    |                               | 0.19                     | 0.19                  |
| Biomass                                                          |                                     |                                    |                               | 58.6                     | 61.7                  |

\* We considered credits for displacing distiller's dried grains with solubles (DDGS), soybean mill, urea, and electricity, which are co-products in the ethanol production process.

\*\* Domestic and foreign CO<sub>2</sub> emissions from land-use change (LUC) are included. Miscanthus has large negative GHG emissions from LUC due to its high crop yield<sup>14</sup>.

\*\*\* Energy inputs for producing 13% concentration of ethanol. Heat demand for ethanol purification (14.5 MJ of NG/biomass per gal ethanol) was adjusted.

**Table S6.** Input materials for ethanol purification and downstream ethanol upgrading process for 1 MJ liquid hydrocarbon fuel produced

|                                  | 0.58 GGE/gal EtOH |          |          | 0.43 GGE/gal EtOH | Unit  |
|----------------------------------|-------------------|----------|----------|-------------------|-------|
|                                  | 100% EtOH         | 50% EtOH | 13% EtOH | 100% EtOH         |       |
| Ethanol                          | 0.042             | 0.044    | 0.046    | 0.059             | kg/MJ |
| Water in ethanol feed            | -                 | 0.041    | 0.293    | -                 | kg/MJ |
| Hydrogen *                       | 0.035             | 0.027    | 0.027    | 0.059             | MJ/MJ |
| Catalyst-ETO                     | 5.4               | 5.6      | 5.9      | 7.5               | mg/MJ |
| Catalyst-Oligomerization         | 3.2               | 3.5      | 3.6      | 5.5               | mg/MJ |
| NG/biomass (for purification) ** | 0.205             | 0.174    | -        | 0.287             | MJ/MJ |
| NG (for ETO)                     | 0.025             | 0.052    | 0.452    | 0.035             | MJ/MJ |

\* Hydrogen required for ETO is assumed to be imported from natural gas steam methane reforming plants transported 150 miles via pipeline.

\*\* For ethanol purification, corn starch feedstock uses natural gas, and corn stover/miscanthus uses biomass as heat source.

**Table S7.** Carbon credit impact on the MFSP

|                                                                  | Corn starch<br>(LCA case 1) | Corn stover<br>(LCA case 5) |
|------------------------------------------------------------------|-----------------------------|-----------------------------|
| GHG emission reduction relative to petroleum<br>reference (g/MJ) | 21                          | 72                          |
| LCFS credit (\$/ton CO <sub>2</sub> ) *                          | 195                         | 195                         |
| LCFS credit (\$/GGE)                                             | 0.50                        | 1.70                        |
| MFSP with LCFS carbon credit (\$/GGE)                            | 3.20                        | 3.28                        |
| US RFS D6 RIN (\$/ton CO <sub>2</sub> ) *                        | 8.91                        |                             |
| US RFS D3 RIN (\$/ton CO <sub>2</sub> ) *                        |                             | 131                         |
| US RFS RIN credit (\$/GGE)                                       | 0.02                        | 1.14                        |
| Total credit (\$/GGE)                                            | 0.52                        | 2.84                        |
| MFSP with total carbon credit (\$/GGE)                           | 3.18                        | 2.14                        |

\* 2019 Q2 data was used as reported in Hannon et al<sup>15</sup>.

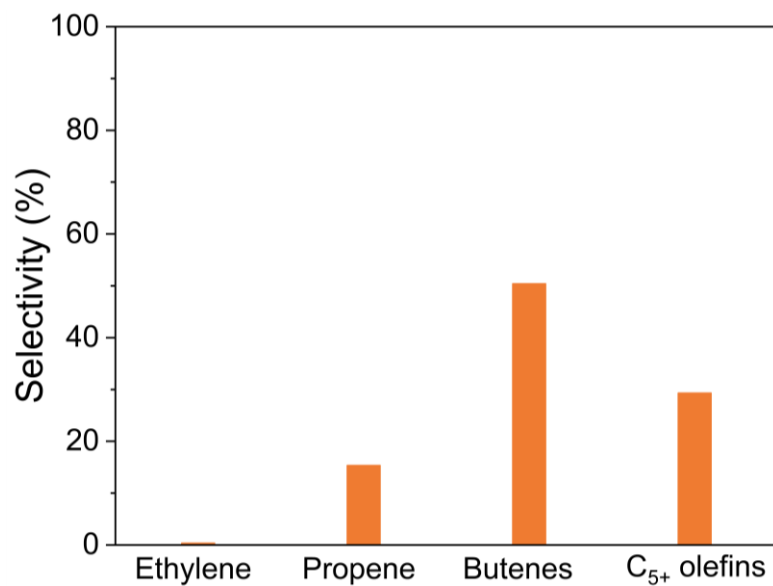

**Figure S10.** Conversion of acetone-butanol-ethanol mixture (ABE in liquid feeding: 60 wt% 1-butanol, 30 wt% acetone and 10 wt% ethanol) ( $0.51 \text{ h}^{-1}$  WHSV, total pressure 106.8 kPa, 1.3 kPa ethanol, 4.8 kPa 1-butanol and 3.1 kPa acetone balanced with  $\text{H}_2$ ) at 623 K over Cu-Zn-Y/Beta. The total carbon conversion is 99%.

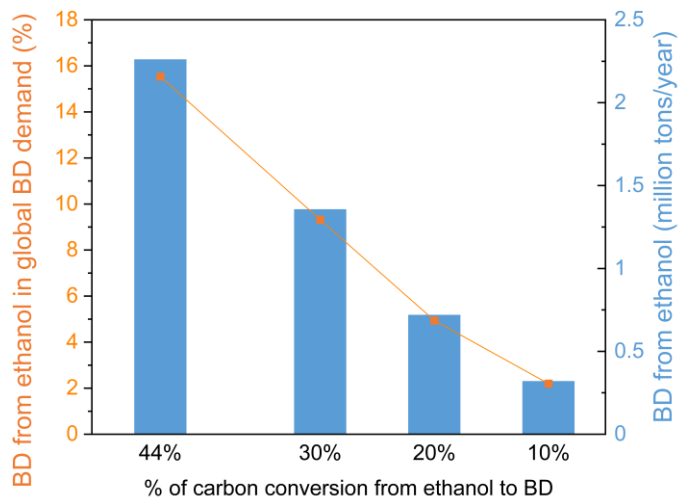

**Figure S11.** BD production volume and percent BD from ethanol in overall BD demand of 2025 when varying the amount of carbon from ethanol to BD, assuming 10% of the predicted 2025 SAFs (4.76 billion gallon/year<sup>16</sup>) is captured by ethanol to jet.

## References

1. Bi, J.; Liu, M.; Song, C.; Wang, X.; Guo, X., C<sub>2</sub>–C<sub>4</sub> light olefins from bioethanol catalyzed by Ce-modified nanocrystalline HZSM-5 zeolite catalysts. *Appl. Phys. B* **2011**, *107* (1-2), 68-76.
2. Tsuchida, T.; Yoshioka, T.; Sakuma, S.; Takeguchi, T.; Ueda, W., Synthesis of biogasoline from ethanol over hydroxyapatite catalyst. *Ind. Eng. Chem. Res.* **2008**, *47* (5), 1443-1452.
3. Xue, F.; Miao, C.; Yue, Y.; Hua, W.; Gao, Z., Direct conversion of bio-ethanol to propylene in high yield over the composite of In<sub>2</sub>O<sub>3</sub> and zeolite beta. *Green Chem.* **2017**, *19* (23), 5582-5590.
4. Huangfu, J.; Mao, D.; Zhai, X.; Guo, Q., Remarkably enhanced stability of HZSM-5 zeolite co-modified with alkaline and phosphorous for the selective conversion of bio-ethanol to propylene. *Appl. Catal., A* **2016**, *520*, 99-104.
5. Duan, C.; Zhang, X.; Zhou, R.; Hua, Y.; Chen, J.; Zhang, L., Hydrothermally synthesized HZSM-5/SAPO-34 composite zeolite catalyst for ethanol conversion to propylene. *Catal. Lett.* **2011**, *141* (12), 1821-1827.
6. Xia, W.; Chen, K.; Takahashi, A.; Li, X.; Mu, X.; Han, C.; Liu, L.; Nakamura, I.; Fujitani, T., Effects of particle size on catalytic conversion of ethanol to propylene over H-ZSM-5 catalysts—Smaller is better. *Catal. Commun.* **2016**, *73*, 27-33.
7. Sun, J.; Zhu, K.; Gao, F.; Wang, C.; Liu, J.; Peden, C. H.; Wang, Y., Direct conversion of bio-ethanol to isobutene on nanosized Zn<sub>x</sub>Zr<sub>y</sub>O<sub>z</sub> mixed oxides with balanced acid–base sites. *J. Am. Chem. Soc.* **2011**, *133* (29), 11096-11099.
8. Zhao, B.; Men, Y.; Zhang, A.; Wang, J.; He, R.; An, W.; Li, S., Influence of different precursors on isobutene production from bio-ethanol over bifunctional Zn<sub>1</sub>Zr<sub>10</sub>O<sub>x</sub> catalysts. *Appl. Catal., A* **2018**, *558*, 150-160.
9. Hayashi, F.; Iwamoto, M., Yttrium-modified ceria as a highly durable catalyst for the selective conversion of ethanol to propene and ethene. *ACS Catal.* **2013**, *3* (1), 14-17.
10. Xia, W.; Wang, F.; Mu, X.; Chen, K.; Wang, L., Ethanol conversion reaction over M/ZrO<sub>2</sub> (M= Mg, Ca, Sr, and Ba) catalysts: effect of alkaline earth metal introduction. *React. Kinet. Mech. Catal.* **2018**, *124* (1), 363-374.
11. Mizuno, S.; Kurosawa, M.; Tanaka, M.; Iwamoto, M., One-path and selective conversion of ethanol to propene on scandium-modified indium oxide catalysts. *Chem. Lett.* **2012**, *41* (9), 892-894.
12. Dagle, V. L.; Winkelman, A. D.; Jaegers, N. R.; Saavedra-Lopez, J.; Hu, J.; Engelhard, M. H.; Habas, S. E.; Akhade, S. A.; Kovarik, L.; Glezakou, V.-A., Single-Step Conversion of Ethanol to n-Butene over Ag-ZrO<sub>2</sub>/SiO<sub>2</sub> Catalysts. *ACS Catal.* **2020**, *10* (18), 10602-10613.
13. Davis, R. E.; Grundl, N. J.; Tao, L.; Bidy, M. J.; Tan, E. C.; Beckham, G. T.; Humbird, D.; Thompson, D. N.; Roni, M. S. *Process design and economics for the conversion of lignocellulosic biomass to hydrocarbon fuels and coproducts: 2018 Biochemical design case update; Biochemical deconstruction and conversion of biomass to fuels and products via integrated biorefinery pathways*; National Renewable Energy Lab.(NREL), Golden, CO (United States): 2018.
14. Dunn, J. B.; Mueller, S.; Kwon, H.-y.; Wang, M. Q., Land-use change and greenhouse gas emissions from corn and cellulosic ethanol. *Biotechnology for biofuels* **2013**, *6* (1), 1-13.
15. Hannon, J. R.; Lynd, L. R.; Andrade, O.; Benavides, P. T.; Beckham, G. T.; Bidy, M. J.; Brown, N.; Chagas, M. F.; Davison, B. H.; Foust, T., Technoeconomic and life-cycle analysis of single-step catalytic conversion of wet ethanol into fungible fuel blendstocks. *Proc. Natl. Acad. Sci. U.S.A.* **2020**, *117* (23), 12576-12583.
16. Aviation fuel consumption in the Sustainable Development Scenario, 2025-2040. <https://www.iea.org/data-and-statistics/charts/aviation-fuel-consumption-in-the-sustainable-development-scenario-2025-2040> (accessed January 7th).
